# Supplementary material for: Chiral supernanostructures for ultrasensitive endonuclease analysis
Source: Royal Society of Chemistry journal article supplement (doi:10.1039/c3tb20985g), 2013-01-01
Supplement: c3tb20985g.pdf [file c3tb20985g.pdf]

1  
2  
3  
4  
5  
6  
7  
8  
9  
10  
11  
12  
13  
14  
15  
16  
17  
18  
19  
20  
21  
22  
23  
24

**Supporting Information**

**Chiral Nanoparticle Pyramids for Ultrasensitive  
Endonuclease Detection**

## 1 **Experimental**

### 2 **Materials.**

3 The bis-(p-sulfonatophenyl)phenylphosphine dihydrate dipotassium salt (BPS), trisodium  
4 citrate ( $C_6H_5Na_3O_7 \cdot 2H_2O$ ,  $\geq 99.0\%$ ) and tetrachloroauric acid trihydrate ( $HAuCl_4 \cdot 3H_2O$ ,  
5  $99.9\%$ ) were obtained from Sigma Aldrich Chemical Company (Atlanta, GA, USA). All  
6 other chemicals were of analytical grade purity or better and were used as received  
7 without further purification. All DNA oligonucleotides (sequences shown in Table S1,  
8 supporting information) were obtained from Sangon (Shanghai, China). The stock  
9 solutions of DNA were prepared with 100 mM Tris-HCl solution (pH=7.5) and kept  
10 frozen at  $-18^\circ C$  during storage. DNase I was purchased from Aladdin Industrial  
11 Corporation (Shanghai, China). The cleavage buffer for DNase I was 10 mM Tris-HCl  
12 solution (pH=7.5) containing 10 mM  $MgCl_2$  and 0.5 mM  $CaCl_2$ . Ultrapure water (18  
13  $M\Omega \cdot cm$ ) was purified with a Millipore filtration system and used in all experiments. All  
14 glassware was cleaned with aqua regia (HCl :  $HNO_3$  in a 3 : 1 ratio by volume) for 12 h  
15 before use.

### 16 **Instruments**

17 Transmission Electron Microscopy (TEM) images were obtained using a JEOL JEM-  
18 2100 transmission electron microscope operating at an acceleration voltage of 200 kV.  
19 The chirality of the pyramid nanostructures was characterized by MOS-450/AF-Circular  
20 dichroism. UV-Visible (UV-Vis) spectra were collected on a UNICO 2100PC UV/Vis  
21 spectrophotometer. The size distribution was obtained using a Malvern Zetasizer Nano  
22 ZS instrument. A 633 nm laser source and backscattering detector at  $173^\circ$  were used for  
23 the dynamic light scattering (DLS) experiment.

### 24 **Synthesis and Functionalization of AuNPs**

25 Two different-sized AuNPs ( $AuNP_1 = 15 \pm 2$  nm, and  $AuNP_2 = 25 \pm 3$  nm) were  
26 synthesized by reduction of  $HAuCl_4$  using trisodium citrate. Briefly, 2.5 mL of freshly  
27 prepared trisodium citrate (1% by weight) was quickly added to 100 mL of boiling  
28 aqueous  $HAuCl_4$  (0.25 mM) under vigorous stirring and reflux. After boiling for 30 min,

1 the reaction was complete and AuNP<sub>1</sub> were obtained. The 1.6 mL trisodium citrate (1%  
2 by weight) was used to prepare AuNP<sub>2</sub>. The synthesized AuNPs were cooled to room  
3 temperature and stored at 4°C. AuNP-DNA conjugates were then prepared. Briefly, the  
4 AuNPs were first modified with BPS. Then, the BPS-protected AuNPs were mixed with  
5 DNA oligonucleotides in a molar ratio of 1 : 5. After incubation for 24 h, the samples  
6 were centrifuged to remove free oligonucleotides. The concentration of AuNP-DNA  
7 conjugates was calculated using Lambert-Beer's law:  $c = A_{450} / (b\epsilon_{450})$ ,  $A_{450}$  is the  
8 absorbance value at 450 nm,  $\epsilon_{450}$  is the corresponding extinction coefficients for each  
9 AuNP size,  $\epsilon_{450}$  (15 nm) =  $2.18 \times 10^8 \text{ M}^{-1}\text{cm}^{-1}$ ,  $\epsilon_{450}$  (25 nm) =  $1.1 \times 10^9 \text{ M}^{-1}\text{cm}^{-1}$ ,  $b = 1 \text{ cm}$ .

#### 10 **Self-assembly of AuNP Pyramids.**

11 The AuNP pyramids were constructed by mixing four equal amounts of AuNP-DNA  
12 conjugates using 1×TBE buffer (pH = 7.5, containing 50 mM NaCl) as the hybridization  
13 buffer. After overnight incubation at room temperature, the pyramids with high yield  
14 were obtained. Five different types of AuNP pyramids were constructed: all four AuNP<sub>1</sub>s  
15 (denoted as 4AuNP<sub>1</sub>); three AuNP<sub>1</sub>s + one AuNP<sub>2</sub> (3AuNP<sub>1</sub>+1AuNP<sub>2</sub>); two AuNP<sub>1</sub>s +  
16 two AuNP<sub>2</sub>s (2AuNP<sub>1</sub>+2AuNP<sub>2</sub>); one AuNP<sub>1</sub> + three AuNP<sub>2</sub>s (1AuNP<sub>1</sub>+3AuNP<sub>2</sub>); four  
17 AuNP<sub>2</sub>s (4AuNP<sub>2</sub>).

#### 18 **Assay of DNase I Activity.**

19 The stability of AuNP pyramids was improved by adding thiolated poly(ethylene glycol)  
20 molecules (mPEG-SH, Mw = 1000) to the pyramid solution at a molar ratio of 500 : 1.  
21 After 30 min incubation, the solution was centrifuged at 5,000 g for 10 min and then  
22 suspended in 0.5 mL of DNase I buffer (10 mM Tris-HCl, 10 mM MgCl<sub>2</sub>, 0.5 mM CaCl<sub>2</sub>,  
23 pH = 7.5) at a final concentration of 2 nM. Different amounts of DNase I were then added  
24 to the solution to give final volumes of 200 μL. To ensure the full reaction, the mixture  
25 was incubated for 30 min at 37°C. The CD spectra were then recorded to determine  
26 DNase I activity.

27

28

1

2

3

**Table S1.** ssDNA sequences used to form AuNP pyramids

| Name      | Sequence                                                                                                                        |
|-----------|---------------------------------------------------------------------------------------------------------------------------------|
| <i>Y1</i> | HS-5'-TTT GCC TGG AGA TAC ATG CAC ATT ACG GCT TTC CCT ATT AGA AGG<br>TCT CAG GTG CGC GTT TCG GTA AGT AGA CGG GAC CAG TTC GCC-3' |
| <i>Y2</i> | HS-5'-TTT CGC GCA CCT GAG ACC TTC TAA TAG GGT TTG CGA CAG TCG TTC<br>AAC TAG AAT GCC CTT TGG GCT GTT CCG GGT GTG GCT CGT CGG-3' |
| <i>Y3</i> | HS-5'-TTT GGC CGA GGA CTC CTG CTC CGC TGC GGT TTG GCG AAC TGG TCC<br>CGT CTA CTT ACC GTT TCC GAC GAG CCA CAC CCG GAA CAG CCC-3' |
| <i>Y4</i> | HS-5'-TTT GCC GTA ATG TGC ATG TAT CTC CAG GCT TTC CGC AGC GGA GCA<br>GGA GTC CTC GGC CTT TGG GCA TTC TAG TTG AAC GAC TGT CGC-3' |

4

5

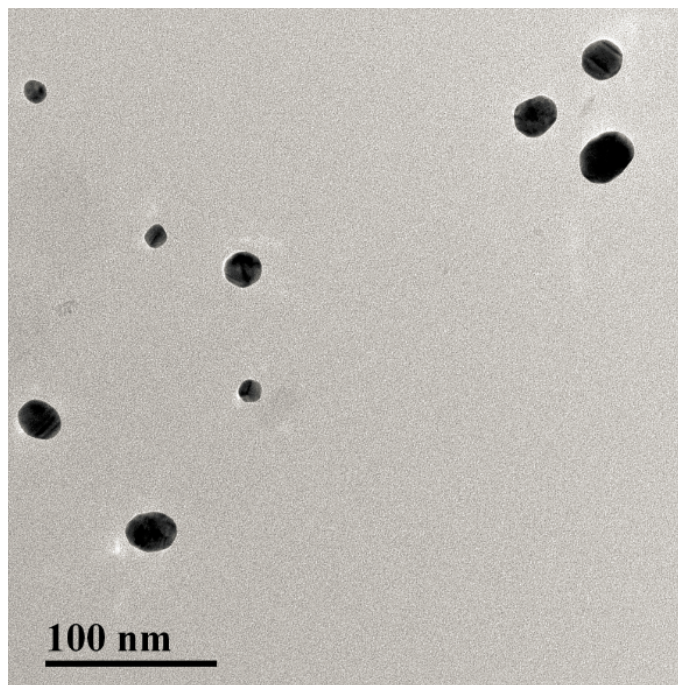

6

7

**Figure S1.** TEM picture of the mixture of AuNP<sub>1</sub> and AuNP<sub>2</sub>.

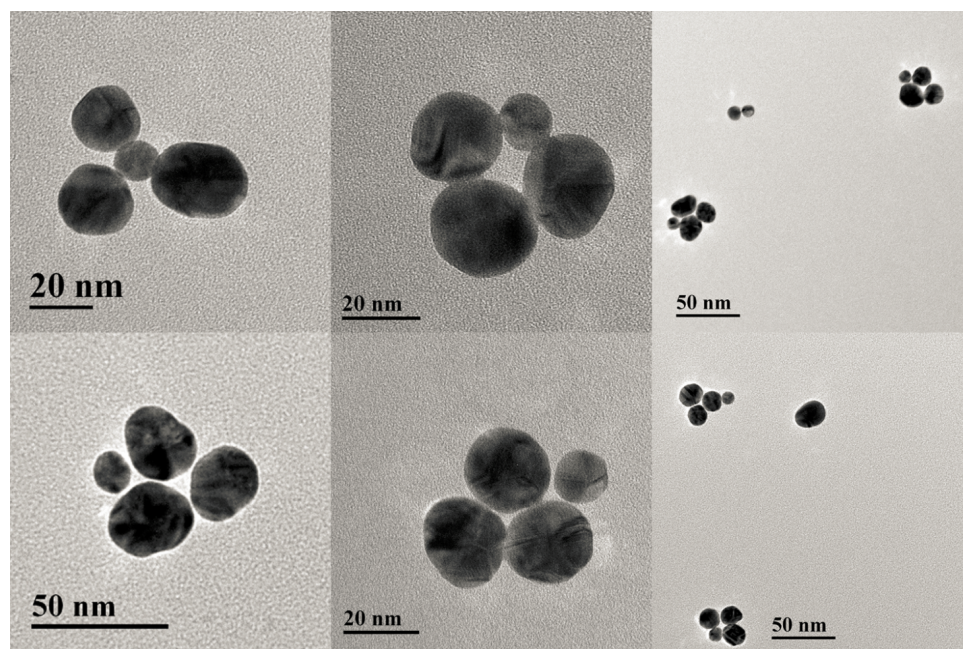

1

2

**Figure S2.** Some other TEM images of 3AuNP<sub>2</sub>+1AuNP<sub>1</sub> pyramid.

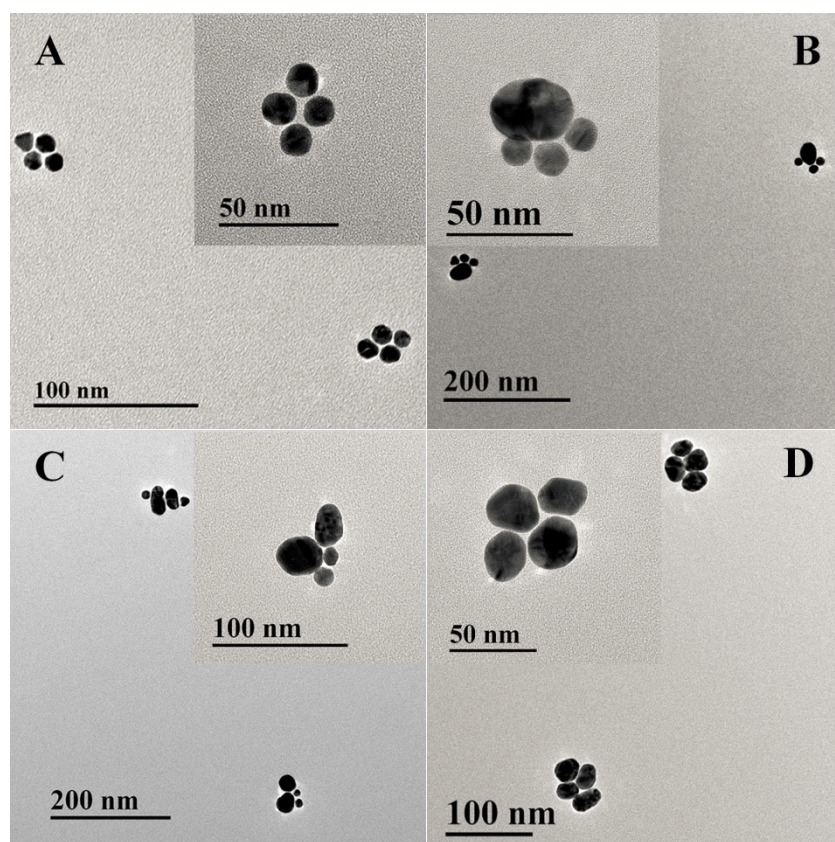

3

4

5

**Figure S3.** TEM images of 4AuNP<sub>1</sub> pyramid (A), 1AuNP<sub>2</sub>+3AuNP<sub>1</sub> pyramid (B), 2AuNP<sub>2</sub>+2AuNP<sub>1</sub> pyramid (C), 4AuNP<sub>2</sub> pyramid (D).

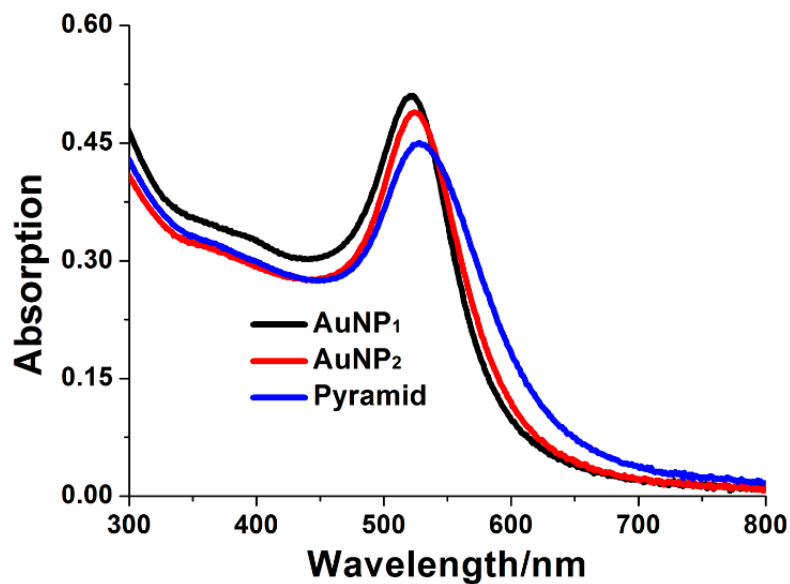

1

Figure S4. UV-Vis spectra of AuNP<sub>1</sub>, AuNP<sub>2</sub> and 1AuNP<sub>1</sub>+3AuNP<sub>2</sub> pyramid.

2

3

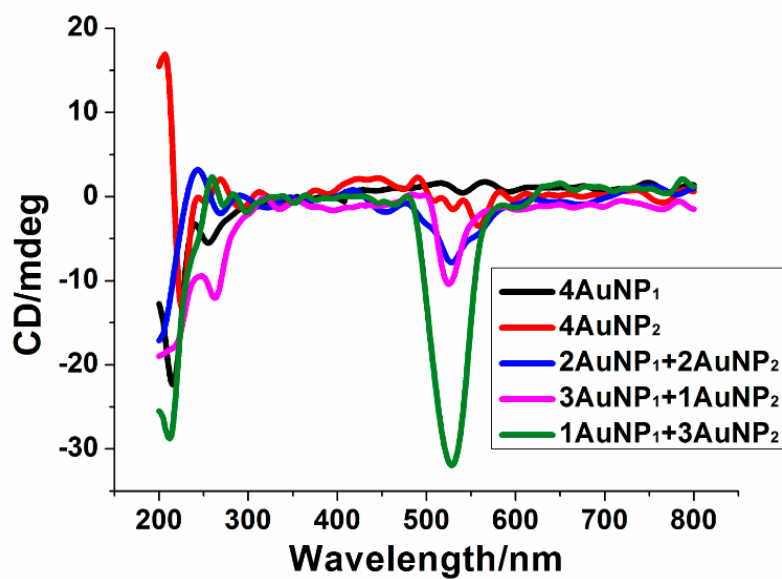

4

Figure S5. CD spectra of the five kinds of AuNP pyramids.

5

6

7

8

1

2 **Table S2.** Detection of DNase I in FBS samples

| sample | Original concentration (U/mL) | Spiked concentration (U/mL) | Determined mean $\pm$ SD <sup>a</sup> (U/mL) | Recovery (%)    |
|--------|-------------------------------|-----------------------------|----------------------------------------------|-----------------|
| FBS 1  | 0.034                         | 0.05                        | 0.079 $\pm$ 0.005                            | 93.3 $\pm$ 5.0  |
|        |                               | 0.1                         | 0.132 $\pm$ 0.004                            | 97.7 $\pm$ 5.2  |
| FBS 2  | 0.025                         | 0.05                        | 0.081 $\pm$ 0.003                            | 109.1 $\pm$ 7.1 |
|        |                               | 0.1                         | 0.131 $\pm$ 0.005                            | 106.3 $\pm$ 4.5 |

3 a: SD was calculated based on three parallel experiments for each sample.
